# Supplementary material for: Blueberry polyphenols prevent cardiomyocyte death by preventing calpain activation and oxidative stress
Source: Royal Society of Chemistry journal article supplement (doi:10.1039/c3fo60588d), 2014-06-09
Supplement: c3fo60588d1.pdf [file c3fo60588d1.pdf]

### Supplementary data legends

**Supplementary Figure 1.** Dose dependent effect of blueberry extracts (Phe, Flv, Acn, Hep) on NE induced cell death. a) Phe; b) Flv; c) Acn; d) Hep. n=100 cells from three independent experiments. #P<0.05 vs control; \*P<0.05 vs NE. NE, norepinephrine; Phe, phenolics; Flv, flavonoids; Acn, anthocyanins; Hep, heteropolymers.
